# Supplementary material for: Structural Descriptors of Benzenoid Hydrocarbons: A Mismatch between the Estimates and Parity Effects in Helicenes
Source: MDPI journal article supplement (doi:10.3390/c8030042), 2022-08-25
Supplement: s1 [file s1]

*Supplementary Materials to the article:*

**Structural Descriptors of Benzenoid Hydrocarbons: a Mismatch between the Estimates and Parity Effects in Helicenes**

Denis Sh. Sabirov <sup>1,\*</sup>, Ottorino Ori <sup>2</sup>, Alina A. Tukhbatullina <sup>1</sup> and Igor S. Shepelevich

<sup>1</sup> Institute of Petrochemistry and Catalysis UFRC RAS, 450075  
Ufa, Russia

<sup>2</sup> Actinium Chemical Research Institute, 00182 Rome, Italy

\* Correspondence: [diozno@mail.ru](mailto:diozno@mail.ru); Tel.: +7 347 284 27 50

Section SA. Numerical data associated with Figure 11.

| Helicene | $\alpha$ (Å <sup>3</sup> )* | $E_{\text{HOMO}}$ (kJ/mol) |                              | $E_{\text{LUMO}}$ (kJ/mol) |                              |
|----------|-----------------------------|----------------------------|------------------------------|----------------------------|------------------------------|
|          |                             | PBE/3 $\zeta$              | $\omega$ B97X-D3/6-311G(d,p) | PBE/3 $\zeta$              | $\omega$ B97X-D3/6-311G(d,p) |
| [4]      | 41.81                       | -509.3                     | -767.8                       | -228.5                     | 41.8                         |
| [5]      | 48.92                       | -505.9                     | -762.6                       | -228.5                     | 41.5                         |
| [6]      | 55.26                       | -499.8                     | -756.8                       | -241.8                     | 21.8                         |
| [7]      | 61.31                       | -493.1                     | -747.1                       | -244.2                     | 19.4                         |
| [8]      | 67.59                       | -487.1                     | -736.8                       | -245.6                     | 14.4                         |
| [9]      | 73.91                       | -482.3                     | -734.2                       | -247.7                     | 11.8                         |
| [10]     | 80.13                       | -476.6                     | -725.5                       | -247.5                     | 9.5                          |
| [11]     | 86.29                       | -472.3                     | -717.7                       | -248.8                     | 8.7                          |
| [12]     | 92.42                       | -469.1                     | -715.6                       | -247.6                     | 8.4                          |
| [13]     | 41.81                       | -463.7                     | -708.7                       | -248.3                     | 9.2                          |

\* Calculated with the PBE/3 $\zeta$  method.

## Section SB. Optimized geometries of the helicene molecules.

| Helicene   | DFT method                            |                                             |
|------------|---------------------------------------|---------------------------------------------|
|            | PBE/3 $\zeta$                         | $\omega$ B97X-D3/6-311G(d,p)                |
| <b>[4]</b> | 6 -1.98728108 -3.13174248 -0.55193478 | 6 -1.7413287103 -3.1981176067 -0.8157149837 |
|            | 6 -0.97609669 -3.82882690 -1.18475318 | 6 -0.6615612917 -3.7966726191 -1.4092263352 |
|            | 6 -1.81521559 -1.78017724 -0.16183007 | 6 -1.6752712291 -1.8639954834 -0.3524797608 |
|            | 6 -0.54434258 -1.13596082 -0.35185438 | 6 -0.4549146466 -1.1476144447 -0.4303594884 |
|            | 6 0.43935344 -1.85954928 -1.07880628  | 6 0.6156481206 -1.7701046176 -1.1225681539  |
|            | 6 0.23162027 -3.16794991 -1.48316836  | 6 0.5184791054 -3.0549840217 -1.5958365753  |
|            | 6 -2.91985464 -1.03573120 0.35052642  | 6 -2.8566145339 -1.2088055364 0.1179772651  |
|            | 6 -2.79795671 0.30459869 0.58389431   | 6 -2.8337812009 0.1106674451 0.4077706823   |
|            | 6 -1.53787792 0.96696603 0.45505217   | 6 -1.6079146289 0.8501668671 0.3847318763   |
|            | 6 -0.36972323 0.23260251 0.10891674   | 6 -0.3974911860 0.2090043726 0.0949584346   |
|            | 6 -1.46706021 2.37698364 0.67859036   | 6 -1.6382528017 2.2543693138 0.6640092562   |
|            | 6 -0.27984178 3.04755497 0.59703439   | 6 -0.5022669472 2.9853439888 0.6852872942   |
|            | 6 0.94113779 2.32988691 0.42071694    | 6 0.7699690587 2.3422659611 0.5658598817    |
|            | 6 0.91384655 0.90392798 0.24149790    | 6 0.8352029752 0.9451561814 0.3382329403    |
|            | 6 2.16061211 0.22500940 0.30750880    | 6 2.1062295524 0.3295775131 0.4747188715    |
|            | 6 2.18298936 3.00869417 0.49518436    | 6 1.9579939727 3.0839706054 0.7584306074    |
|            | 6 3.37926030 2.31776977 0.47446826    | 6 3.1794969863 2.4655978934 0.8037480246    |
|            | 6 3.35906649 0.91027325 0.41990811    | 6 3.2437504748 1.0652411449 0.6979263989    |
|            | 1 -2.95481420 -3.60370994 -0.37035537 | 1 -2.6821585052 -3.7323226285 -0.7156936840 |
|            | 1 -1.12531161 -4.86528540 -1.48865151 | 1 -0.7253564390 -4.8176470001 -1.7710403104 |
|            | 1 1.35765409 -1.36130857 -1.37729645  | 1 1.5129179958 -1.2059091199 -1.3369096338  |
|            | 1 1.00590050 -3.68215132 -2.05385470  | 1 1.3543855515 -3.4935737878 -2.1314242813  |
|            | 1 -3.87468386 -1.54476082 0.49267921  | 1 -3.7805972900 -1.7766438009 0.1773923865  |
|            | 1 -3.66022515 0.89515495 0.89863080   | 1 -3.7433621830 0.6320573629 0.6919368357   |
|            | 1 -2.39413476 2.91133785 0.89381886   | 1 -2.6039238330 2.7237698831 0.8285194934   |
|            | 1 -0.23789434 4.13045454 0.72582996   | 1 -0.5302817159 4.0581197072 0.8528380036   |
|            | 1 2.17339301 4.09494925 0.60384589    | 1 1.8797738027 4.1587658529 0.8974827588    |
|            | 1 4.32743359 2.85176206 0.54293096    | 1 4.0840667884 3.0435029822 0.9628600932    |
|            | 1 2.17717409 -0.86123496 0.32684270   | 1 2.1808175502 -0.7491157462 0.4636739389   |
|            | 1 4.29287338 0.35046318 0.48462814    | 1 4.1963452167 0.5579298275 0.8128983730    |
| <b>[5]</b> | 6 -3.50223446 -0.44986784 -0.34164453 | C -3.4606845457 -0.7066947180 -0.1472159515 |

|     |                                       |                                             |
|-----|---------------------------------------|---------------------------------------------|
|     | 6 -2.48780274 0.40742511 0.18966389   | 6 -2.4883341103 0.2939367800 0.1865770579   |
|     | 6 -3.20021653 -1.68872821 -0.83099002 | 6 -3.0929446622 -1.9800824791 -0.4039075449 |
|     | 6 -1.11509860 0.02193965 0.12840161   | 6 -1.1169870680 -0.0117005990 0.1559338116  |
|     | 6 -0.83691037 -1.38070953 -0.15651786 | 6 -0.7527527082 -1.4255623150 0.1299454182  |
|     | 6 -1.87819505 -2.21087289 -0.68960708 | 6 -1.7336655276 -2.3878829362 -0.2047885245 |
|     | 6 -2.86185217 1.63000774 0.81707835   | 6 -2.9251502307 1.5891562598 0.5826762183   |
|     | 6 -1.91406357 2.42608452 1.40183234   | 6 -2.0239456842 2.5259295603 0.9698651619   |
|     | 6 -0.52895927 2.15457582 1.21200335   | 6 -0.6303650194 2.2980520167 0.7928547813   |
|     | 6 -0.11704406 1.02444863 0.44401273   | 6 -0.1747758486 1.0836381528 0.2518350828   |
|     | 6 0.44472006 3.04638314 1.76240385    | 6 0.3026022791 3.3310930606 1.1399913613    |
|     | 6 1.77552688 2.89850616 1.49311101    | 6 1.6188971845 3.2047084438 0.8687067281    |
|     | 6 2.20842052 1.93032587 0.53623247    | 6 2.0880986289 2.0931635544 0.0954536623    |
|     | 6 1.25854492 1.02260399 -0.03946286   | 6 1.1912477666 1.0606250633 -0.2645780382   |
|     | 1 -3.92146468 1.88430965 0.87534648   | 1 -3.9920154502 1.7877069499 0.6276256441   |
|     | 1 -2.19935942 3.31402016 1.96841884   | 1 -2.3502388624 3.4860637350 1.3587216638   |
|     | 1 0.09390511 3.85331059 2.40829015    | 1 -0.0812050306 4.2190955872 1.6340273732   |
|     | 1 2.51532459 3.56685805 1.93682551    | 1 2.3271470286 3.9765592362 1.1553688605    |
|     | 6 3.55299139 1.92100215 0.08570753    | 6 3.4146530705 2.0767716400 -0.3940654293   |
|     | 6 1.68615413 0.25661844 -1.15470743   | 6 1.6296625917 0.1265405092 -1.2355491242   |
|     | 6 0.38366634 -2.01434660 0.19286264   | 6 0.5076159835 -1.9030756058 0.5661229152   |
|     | 6 -1.61022937 -3.57099032 -0.98827541 | 6 -1.3903036565 -3.7590096609 -0.2417412649 |
|     | 6 0.60504508 -3.35571313 -0.06560561  | 6 0.8080202732 -3.2417271510 0.5624735100   |
|     | 6 -0.38482705 -4.13783979 -0.69549948 | 6 -0.1394102740 -4.1836951273 0.1215081211  |
|     | 1 1.15845335 -1.43459749 0.68824744   | 1 1.2454054786 -1.1982110688 0.9276522475   |
|     | 1 -2.41031337 -4.17439938 -1.42130256 | 1 -2.1527392581 -4.4769343441 -0.5310732107 |
|     | 1 1.55143332 -3.81044436 0.22917317   | 1 1.7791905003 -3.5751635288 0.9136794243   |
|     | 1 -0.19591855 -5.18894482 -0.91574621 | 1 0.1103211219 -5.2396725553 0.1044843350   |
|     | 6 2.99349022 0.29975653 -1.60649431   | 6 2.9086671945 0.1522788218 -1.7305385089   |
|     | 6 3.94934297 1.11067355 -0.96067530   | 6 3.8279595057 1.1184279344 -1.2819307608   |
|     | 1 -4.53100443 -0.08519762 -0.34643698 | 1 -4.5036857579 -0.4069899885 -0.1946335735 |
|     | 1 -3.97505784 -2.32736182 -1.25832963 | 1 -3.8285641279 -2.7295134203 -0.6809453626 |
|     | 1 4.26384163 2.60011983 0.56030095    | 1 4.0947335423 2.8632096925 -0.0785113581   |
|     | 1 0.96542025 -0.36891887 -1.67535639  | 1 0.9331802173 -0.6123893130 -1.6104924747  |
|     | 1 3.28150439 -0.29374436 -2.47490215  | 1 3.2068732292 -0.5723276217 -2.4813722980  |
|     | 1 4.98276567 1.12370896 -1.30835760   | 1 4.8434895822 1.1236820128 -1.6641609910   |
| [6] | 6 -1.41199255 -3.33523393 0.20796651  | C -1.2392630825 -3.2064629777 0.6133211983  |
|     | 6 -0.17571746 -3.87943983 0.66164684  | 6 0.0247115846 -3.6178906121 1.1267207867   |

|   |             |             |             |   |               |               |               |
|---|-------------|-------------|-------------|---|---------------|---------------|---------------|
| 6 | -1.47413731 | -1.99369693 | -0.27127996 | 6 | -1.3712495987 | -1.9696096332 | -0.0361305427 |
| 6 | -0.33135828 | -1.12967718 | -0.03021745 | 6 | -0.2771658586 | -1.0194225360 | 0.0694560012  |
| 6 | 0.92969388  | -1.77107489 | 0.19604009  | 6 | 0.9976310786  | -1.5387423167 | 0.3815878899  |
| 6 | 0.97666669  | -3.14905858 | 0.55471277  | 6 | 1.1228277024  | -2.8511337709 | 0.9236235786  |
| 6 | -0.34508052 | 0.32263646  | 0.00294442  | 6 | -0.3777355766 | 0.4180394533  | -0.1156394275 |
| 6 | 0.87939602  | 1.00951242  | -0.24654596 | 6 | 0.7880487268  | 1.1245314119  | -0.4506932203 |
| 6 | 2.11339974  | 0.29714409  | -0.25685048 | 6 | 2.0647425162  | 0.5000338637  | -0.3444060802 |
| 6 | 2.14112449  | -1.03325593 | 0.06272218  | 6 | 2.1666048808  | -0.7551349130 | 0.1548610837  |
| 6 | -1.49311018 | 1.13057375  | 0.39114520  | 6 | -1.5850446624 | 1.1987776128  | 0.1325544549  |
| 6 | -1.44713914 | 2.55232382  | 0.20885538  | 6 | -1.6303871096 | 2.5509241350  | -0.2790530209 |
| 6 | -0.24971837 | 3.16946864  | -0.26758993 | 6 | -0.4617963113 | 3.1664659376  | -0.8352039167 |
| 6 | 0.88590276  | 2.42850399  | -0.42995822 | 6 | 0.7108578148  | 2.4977876071  | -0.8588148408 |
| 6 | -2.63254142 | 0.59388953  | 1.04137623  | 6 | -2.6929134813 | 0.6976092636  | 0.8565681757  |
| 6 | -3.69592333 | 1.39460552  | 1.42061961  | 6 | -3.8121227990 | 1.4611782305  | 1.0738105937  |
| 6 | -3.68165731 | 2.77862096  | 1.15561962  | 6 | -3.8858093281 | 2.7742624336  | 0.5765412609  |
| 6 | -2.56623626 | 3.34451294  | 0.56801462  | 6 | -2.8054868180 | 3.3095651602  | -0.0744697694 |
| 6 | -2.57719707 | -4.16517782 | 0.18170404  | 6 | -2.3631596415 | -4.0918136809 | 0.7188131602  |
| 1 | -0.15578882 | -4.91240597 | 1.01271105  | 1 | 0.1006702099  | -4.5898275748 | 1.6051570420  |
| 6 | -2.63306332 | -1.62750459 | -1.07396257 | 6 | -2.5544771125 | -1.7725665972 | -0.8663962137 |
| 1 | 1.94733405  | -3.59554958 | 0.77671355  | 1 | 2.1099936554  | -3.2015232663 | 1.2104848904  |
| 1 | 3.03591132  | 0.85058933  | -0.43942797 | 1 | 2.9505241623  | 1.0781214878  | -0.5907241417 |
| 1 | 3.08786774  | -1.56206059 | 0.18468115  | 1 | 3.1365140913  | -1.2035789675 | 0.3490321321  |
| 1 | -0.24190070 | 4.24906063  | -0.42695573 | 1 | -0.5219348254 | 4.1977345992  | -1.1706963342 |
| 1 | 1.82981980  | 2.90711761  | -0.69691342 | 1 | 1.6227273233  | 2.9823504258  | -1.1957961940 |
| 1 | -2.66234684 | -0.46910974 | 1.26652372  | 1 | -2.6547634360 | -0.3030030496 | 1.2669565021  |
| 1 | -4.54854059 | 0.94807273  | 1.93332720  | 1 | -4.6428822560 | 1.0471143628  | 1.6359140937  |
| 1 | -4.53122616 | 3.40039134  | 1.43965530  | 1 | -4.7804405822 | 3.3675646986  | 0.7362597667  |
| 1 | -2.51513290 | 4.42194366  | 0.39962506  | 1 | -2.8248552138 | 4.3376268821  | -0.4253773615 |
| 6 | -3.77847195 | -2.49035263 | -1.09060144 | 6 | -3.6480010482 | -2.6596658247 | -0.7376852905 |
| 6 | -3.73947787 | -3.73704696 | -0.39344031 | 6 | -3.5388210508 | -3.8014712957 | 0.1216960002  |
| 1 | -2.50988030 | -5.15838528 | 0.62923372  | 1 | -2.2424601584 | -5.0030474087 | 1.2976625973  |
| 6 | -2.65482903 | -0.49945822 | -1.93204701 | 6 | -2.6272624965 | -0.7876487788 | -1.8802727976 |
| 6 | -4.91725063 | -2.13382387 | -1.85539973 | 6 | -4.8135442899 | -2.4579961893 | -1.5120606435 |
| 1 | -4.63000727 | -4.36789989 | -0.39374879 | 1 | -4.3946122991 | -4.4624739270 | 0.2244603042  |
| 6 | -3.76432562 | -0.19469628 | -2.70146227 | 6 | -3.7546539745 | -0.6301896685 | -2.6459505855 |
| 6 | -4.92062616 | -0.99806893 | -2.64255857 | 6 | -4.8771936689 | -1.4521856937 | -2.4408154492 |
| 1 | -1.77089190 | 0.12906983  | -2.00349021 | 1 | -1.7691661077 | -0.1576509242 | -2.0749662975 |

|     |                                                                                                                                                                                                                                                                                                                                                                                                                                                                                                                                                                                                                                                                                                                                                                                                                                                                                                                                                                                                                                                                                                                                                                                                                                                                                                                                                                            |                                                                                                                                                                                                                                                                                                                                                                                                                                                                                                                                                                                                                                                                                                                                                                                                                                                                                                                                                                                                                                                                                                                                                                                                                                                                                                                                                                                                                                                                                                                                                                                         |
|-----|----------------------------------------------------------------------------------------------------------------------------------------------------------------------------------------------------------------------------------------------------------------------------------------------------------------------------------------------------------------------------------------------------------------------------------------------------------------------------------------------------------------------------------------------------------------------------------------------------------------------------------------------------------------------------------------------------------------------------------------------------------------------------------------------------------------------------------------------------------------------------------------------------------------------------------------------------------------------------------------------------------------------------------------------------------------------------------------------------------------------------------------------------------------------------------------------------------------------------------------------------------------------------------------------------------------------------------------------------------------------------|-----------------------------------------------------------------------------------------------------------------------------------------------------------------------------------------------------------------------------------------------------------------------------------------------------------------------------------------------------------------------------------------------------------------------------------------------------------------------------------------------------------------------------------------------------------------------------------------------------------------------------------------------------------------------------------------------------------------------------------------------------------------------------------------------------------------------------------------------------------------------------------------------------------------------------------------------------------------------------------------------------------------------------------------------------------------------------------------------------------------------------------------------------------------------------------------------------------------------------------------------------------------------------------------------------------------------------------------------------------------------------------------------------------------------------------------------------------------------------------------------------------------------------------------------------------------------------------------|
|     | 1 -5.78477478 -2.79623938 -1.83463335<br>1 -3.73833942 0.67281473 -3.36174750<br>1 -5.79802561 -0.74109203 -3.23684502                                                                                                                                                                                                                                                                                                                                                                                                                                                                                                                                                                                                                                                                                                                                                                                                                                                                                                                                                                                                                                                                                                                                                                                                                                                     | 1 -5.6502104597 -3.1374597415 -1.3744834398<br>1 -3.7749336970 0.1308798740 -3.4192097575<br>1 -5.7730981521 -1.3095242104 -3.0364725923                                                                                                                                                                                                                                                                                                                                                                                                                                                                                                                                                                                                                                                                                                                                                                                                                                                                                                                                                                                                                                                                                                                                                                                                                                                                                                                                                                                                                                                |
| [7] | 6 0.44187248 -3.12708688 0.66314864<br>6 1.70231771 -3.68017507 1.03393364<br>6 0.35331333 -1.76358080 0.23757812<br>6 1.47420311 -0.89350784 0.56448227<br>6 2.75124002 -1.51510143 0.74004638<br>6 2.83818746 -2.92058086 0.96182638<br>6 1.40479767 0.54455137 0.74658710<br>6 2.60744739 1.29483092 0.59928143<br>6 3.86731458 0.62907821 0.54208058<br>6 3.93867183 -0.72704631 0.70939785<br>6 0.21038929 1.27140915 1.14904070<br>6 0.20184033 2.70368576 1.07394099<br>6 1.39236581 3.40339565 0.70930153<br>6 2.56537938 2.72306538 0.54441959<br>6 -0.92024475 0.64450645 1.73118508<br>6 -2.03179359 1.37133980 2.12118578<br>6 -2.07362151 2.76906228 1.94468081<br>6 -0.96397161 3.42110395 1.44226444<br>6 -0.72860461 -3.93972850 0.70235890<br>1 1.74661779 -4.73372746 1.31451261<br>6 -0.83524126 -1.37326455 -0.49775273<br>1 3.82168317 -3.36095977 1.13347507<br>1 4.77223825 1.23042476 0.44072455<br>1 4.90172052 -1.23394489 0.78900063<br>1 1.36144662 4.49204493 0.63912988<br>1 3.49946094 3.25822234 0.36427578<br>1 -0.90500957 -0.42867121 1.89979029<br>1 -2.87696815 0.85550964 2.57823896<br>1 -2.96016359 3.33282065 2.23666787<br>1 -0.95396668 4.50904799 1.35267735<br>6 -2.00938869 -2.16509175 -0.33771437<br>6 -1.93737960 -3.43501282 0.30682704<br>1 -0.64238310 -4.95799017 1.08505964<br>6 -0.89551258 -0.27600259 -1.45136702 | 6 0.4728960736 -3.0076040827 1.1221146473<br>6 1.7323239035 -3.4897831297 1.5912509761<br>6 0.3839219137 -1.7371708203 0.5204584107<br>6 1.4964465937 -0.8202727836 0.7252743649<br>6 2.7555248104 -1.3821529025 1.0128140498<br>6 2.8500273121 -2.7406098511 1.4420930275<br>6 1.4083771549 0.6249499893 0.6564475435<br>6 2.5832578284 1.3461155556 0.3982815066<br>6 3.8530786397 0.7034872611 0.4898596140<br>6 3.9352826824 -0.5921613236 0.8799237365<br>6 0.1876742848 1.3859475859 0.8849943706<br>6 0.1414451724 2.7445053019 0.4990394239<br>6 1.3301424523 3.3878871016 0.0231632754<br>6 2.5127307432 2.7349993908 0.0471840197<br>6 -0.9342525309 0.8580981834 1.5672332137<br>6 -2.0746979294 1.5999294644 1.7485422870<br>6 -2.1522637611 2.9159251020 1.2584356275<br>6 -1.0547172758 3.4796289859 0.6621113927<br>6 -0.6943680234 -3.8150743724 1.2594624535<br>1 1.7794292872 -4.4910116062 2.0091260027<br>6 -0.8057615571 -1.4475552935 -0.2562351701<br>1 3.8272715666 -3.1339884478 1.7062971011<br>1 4.7489786742 1.2904694520 0.3093704443<br>1 4.8979196678 -1.0641834843 1.0536099059<br>1 1.2744553583 4.4277065689 -0.2858024721<br>1 3.4347122233 3.2428859408 -0.2214413170<br>1 -0.8888997014 -0.1426764233 1.9770006501<br>1 -2.9182329002 1.1673972832 2.2769157857<br>1 -3.0636578105 3.4910883723 1.3869093829<br>1 -1.0775392102 4.5121499424 0.3248688601<br>6 -1.9654249141 -2.1914575754 0.0070484831<br>6 -1.8912044538 -3.3733920090 0.8014825103<br>1 -0.6090647339 -4.7679581138 1.7735124122<br>6 -0.8650096439 -0.4644501673 -1.3291970500 |

|     |                                                                                                                                                                                                                                                                                                                                                                                                                                                                                                                                                                                                                                                                                                                                                                                                                                                                                                                                   |                                                                                                                                                                                                                                                                                                                                                                                                                                                                                                                                                                                                                                                                                                                                                                                                                                                                                                                                                                                                                                                                                |
|-----|-----------------------------------------------------------------------------------------------------------------------------------------------------------------------------------------------------------------------------------------------------------------------------------------------------------------------------------------------------------------------------------------------------------------------------------------------------------------------------------------------------------------------------------------------------------------------------------------------------------------------------------------------------------------------------------------------------------------------------------------------------------------------------------------------------------------------------------------------------------------------------------------------------------------------------------|--------------------------------------------------------------------------------------------------------------------------------------------------------------------------------------------------------------------------------------------------------------------------------------------------------------------------------------------------------------------------------------------------------------------------------------------------------------------------------------------------------------------------------------------------------------------------------------------------------------------------------------------------------------------------------------------------------------------------------------------------------------------------------------------------------------------------------------------------------------------------------------------------------------------------------------------------------------------------------------------------------------------------------------------------------------------------------|
|     | 6 -3.26336455 -1.70789981 -0.85119289<br>1 -2.85077834 -4.02386522 0.40549257<br>6 -2.17153144 0.16010930 -1.93981230<br>6 -3.35422444 -0.55046141 -1.57086349<br>6 0.25722426 0.31843317 -2.02413678<br>1 -4.15118122 -2.31014276 -0.65004581<br>6 -2.24384427 1.24306619 -2.85162067<br>1 -4.31809425 -0.19252284 -1.93673646<br>6 -1.09845161 1.84268141 -3.33887029<br>6 0.16096722 1.34778309 -2.94452333<br>1 1.23964286 -0.05938343 -1.75489223<br>1 -3.22833800 1.57248759 -3.18926263<br>1 -1.16621923 2.66667700 -4.04983902<br>1 1.06994867 1.77041364 -3.37397814                                                                                                                                                                                                                                                                                                                                                     | 6 -3.2275477794 -1.7711235934 -0.5285496844<br>1 -2.7989205399 -3.9456327933 0.9702004219<br>6 -2.1264079145 -0.0494445272 -1.8132807810<br>6 -3.3151321087 -0.6981476371 -1.3448094029<br>6 0.2849565946 0.0309373854 -1.9885033894<br>1 -4.1163758542 -2.3271002804 -0.2437284363<br>6 -2.2003275786 0.9465418328 -2.8133550106<br>1 -4.2765173523 -0.3563355403 -1.7171039631<br>6 -1.0648626472 1.4662322255 -3.3777773376<br>6 0.1913158309 0.9727965051 -2.9820463187<br>1 1.2600322800 -0.3542993668 -1.7196056183<br>1 -3.1806784017 1.2754329885 -3.1470697860<br>1 -1.1335137005 2.2260143099 -4.1496427100<br>1 1.0931911897 1.3324602077 -3.4668725985                                                                                                                                                                                                                                                                                                                                                                                                             |
| [8] | 6 -1.26136863 -3.26153874 0.05448027<br>6 0.00031954 -3.75915504 0.49605063<br>6 -1.39463580 -1.89061546 -0.32720613<br>6 -0.35304141 -0.97179091 0.10332358<br>6 0.94003773 -1.52694595 0.35941991<br>6 1.09081388 -2.93378496 0.54148072<br>6 -0.51263660 0.45690107 0.28903943<br>6 0.65401167 1.27235675 0.22797099<br>6 1.94794428 0.67649311 0.26461586<br>6 2.08050513 -0.67569703 0.43051863<br>6 -1.76377082 1.11137509 0.64029032<br>6 -1.84861875 2.54140210 0.57963312<br>6 -0.68173450 3.30955625 0.27993774<br>6 0.53452140 2.69695187 0.17767587<br>6 -2.87765455 0.41577214 1.17546737<br>6 -4.04047298 1.07501602 1.53341508<br>6 -4.15411615 2.47017455 1.36713946<br>6 -3.06588101 3.18849254 0.90996361<br>6 -2.39014506 -4.13138056 -0.00635877<br>1 0.08588953 -4.81916428 0.74034560<br>6 -2.56099367 -1.52568877 -1.11521268<br>1 2.08269286 -3.32523298 0.77328885<br>1 2.82394099 1.32649362 0.23465060 | C -1.3955201923 -3.2580555069 0.1569348695<br>6 -0.1555147545 -3.7881171267 0.6275073567<br>6 -1.4701739945 -1.9184446558 -0.2644438499<br>6 -0.3916117420 -1.0249365624 0.1261549416<br>6 0.8597821743 -1.6080384263 0.4012411424<br>6 0.9543035652 -3.0122036562 0.6478387267<br>6 -0.4986116953 0.4160151391 0.2261724903<br>6 0.6770903308 1.1719902750 0.1147372577<br>6 1.9494607148 0.5334764920 0.1859194879<br>6 2.0328269111 -0.7984827687 0.4252414914<br>6 -1.7350101505 1.1314473605 0.5102872010<br>6 -1.7783094551 2.5322928488 0.3291048182<br>6 -0.5796004025 3.2421972581 -0.0061988174<br>6 0.6058113960 2.5959037925 -0.0409618451<br>6 -2.8722950506 0.5099267165 1.0819261360<br>6 -4.0195966907 1.2164979088 1.3397752241<br>6 -4.0914706772 2.5908625969 1.0468242254<br>6 -2.9816676217 3.2353106121 0.5668044611<br>6 -2.5588672410 -4.0853945904 0.1133714093<br>1 -0.1130490500 -4.8355886675 0.9112769125<br>6 -2.6218910141 -1.5240274333 -1.0589967055<br>1 1.9226219627 -3.4272584955 0.9119408280<br>1 2.8440455912 1.1455901952 0.1175125284 |

|     |                                                                                                                                                                                                                                                                                                                                                                                                                                                                                                                                                                                                                                                                                                                                                                                                                                                                                                                                                                                                                                                                                                                                                                                                                                                                                      |                                                                                                                                                                                                                                                                                                                                                                                                                                                                                                                                                                                                                                                                                                                                                                                                                                                                                                                                                                                                                                                                                                                                                                                                                                                                                                                                                                                                                                                                                  |
|-----|--------------------------------------------------------------------------------------------------------------------------------------------------------------------------------------------------------------------------------------------------------------------------------------------------------------------------------------------------------------------------------------------------------------------------------------------------------------------------------------------------------------------------------------------------------------------------------------------------------------------------------------------------------------------------------------------------------------------------------------------------------------------------------------------------------------------------------------------------------------------------------------------------------------------------------------------------------------------------------------------------------------------------------------------------------------------------------------------------------------------------------------------------------------------------------------------------------------------------------------------------------------------------------------|----------------------------------------------------------------------------------------------------------------------------------------------------------------------------------------------------------------------------------------------------------------------------------------------------------------------------------------------------------------------------------------------------------------------------------------------------------------------------------------------------------------------------------------------------------------------------------------------------------------------------------------------------------------------------------------------------------------------------------------------------------------------------------------------------------------------------------------------------------------------------------------------------------------------------------------------------------------------------------------------------------------------------------------------------------------------------------------------------------------------------------------------------------------------------------------------------------------------------------------------------------------------------------------------------------------------------------------------------------------------------------------------------------------------------------------------------------------------------------|
|     | 1 3.06124353 -1.13021755 0.58033341<br>1 -0.76917100 4.39545441 0.21556549<br>1 1.44586802 3.28486943 0.05538856<br>1 -2.80645847 -0.65681571 1.33602417<br>1 -4.87097692 0.50797576 1.95537496<br>1 -5.08013248 2.98086166 1.63340664<br>1 -3.11340308 4.27640581 0.83185536<br>6 -3.71955752 -2.35446405 -0.98601997<br>6 -3.60702944 -3.65640259 -0.41387370<br>1 -2.27248573 -5.16225529 0.33139238<br>6 -2.65038848 -0.39223868 -2.01433945<br>6 -4.98888016 -1.87979543 -1.42630279<br>1 -4.50010347 -4.28137302 -0.36265239<br>6 -3.94562507 0.11542966 -2.32164025<br>6 -5.10867214 -0.63526881 -1.98337054<br>6 -1.52052355 0.20132613 -2.71296144<br>1 -5.86385584 -2.51368785 -1.27308619<br>6 -4.08543873 1.35919440 -3.01429009<br>1 -6.08718300 -0.23063578 -2.24711847<br>6 -2.99472713 2.03890920 -3.47624207<br>6 -1.69584429 1.44883394 -3.39767289<br>6 -0.27495524 -0.45795548 -2.87087154<br>1 -5.09216404 1.75266361 -3.16540909<br>1 -3.10621071 2.99965882 -3.98171282<br>6 -0.59892154 2.04090619 -4.07278872<br>6 0.62159169 1.39788425 -4.15098238<br>1 -0.14519468 -1.45393968 -2.45557690<br>1 -0.75059676 3.00334406 -4.56535816<br>1 1.45347035 1.85608375 -4.68692636<br>6 0.76761723 0.12037788 -3.57332635<br>1 1.70608246 -0.42359707 -3.68599534 | 1 2.9930657820 -1.2794048815 0.5879531572<br>1 -0.6338105080 4.3168755292 -0.1549017158<br>1 1.5316759307 3.1401152553 -0.2039960718<br>1 -2.8309182161 -0.5399557160 1.3435181239<br>1 -4.8728404672 0.7130524661 1.7830871979<br>1 -5.0075106676 3.1414170336 1.2362551831<br>1 -2.9987836493 4.3074672298 0.3908876067<br>6 -3.7974777981 -2.2857285907 -0.9152768461<br>6 -3.7404455257 -3.5801508091 -0.3141406881<br>1 -2.4892641441 -5.1024240632 0.4878754713<br>6 -2.6615514043 -0.3900302986 -1.9584106659<br>6 -5.0452989251 -1.7603457862 -1.3615412097<br>1 -4.6530257223 -4.1663989460 -0.2570665266<br>6 -3.9106991767 0.1735417704 -2.2526010069<br>6 -5.1070540452 -0.5253766829 -1.9181387334<br>6 -1.4969629759 0.1683636737 -2.6308820442<br>1 -5.9448037426 -2.3468899983 -1.1982145034<br>6 -3.9895517491 1.4467615629 -2.9082796803<br>1 -6.0614750314 -0.0807625995 -2.1848566658<br>6 -2.8746084198 2.0855605540 -3.3242285728<br>6 -1.6006341860 1.4327257829 -3.2529435555<br>6 -0.2870861969 -0.5484237882 -2.7979590461<br>1 -4.9705830990 1.8940872282 -3.0397497242<br>1 -2.9313664632 3.0684501392 -3.7829672172<br>6 -0.4668108192 2.0042776649 -3.8745760839<br>6 0.7155291711 1.3157611587 -3.9546226000<br>1 -0.2191235503 -1.5648897329 -2.4311033159<br>1 -0.5586738104 2.9935320412 -4.3145416917<br>1 1.5782014916 1.7592492319 -4.4415161429<br>6 0.7900643221 0.0083446012 -3.4391451999<br>1 1.7020532569 -0.5682399818 -3.5571335943 |
| [9] | 6 0.57140958 -2.58532548 -3.66214037<br>6 1.68446910 -1.86285877 -4.13664055<br>6 -1.43081653 -3.22095370 0.08931681<br>6 -0.15304098 -3.73644233 0.45616630<br>6 -1.55954123 -1.85865927 -0.31989339<br>6 -0.46681830 -0.95655715 -0.00292866                                                                                                                                                                                                                                                                                                                                                                                                                                                                                                                                                                                                                                                                                                                                                                                                                                                                                                                                                                                                                                       | C 0.3012712386 -2.9346629440 -3.3514942153<br>6 1.4969663464 -2.3656844222 -3.8247213750<br>6 -1.7461519348 -3.1148262904 0.2820494876<br>6 -0.5169049286 -3.7424754467 0.6466860407<br>6 -1.7371248377 -1.7958810139 -0.2016908723<br>6 -0.5458202407 -0.9976298232 0.0172547752                                                                                                                                                                                                                                                                                                                                                                                                                                                                                                                                                                                                                                                                                                                                                                                                                                                                                                                                                                                                                                                                                                                                                                                                |



|   |             |             |             |   |               |               |               |
|---|-------------|-------------|-------------|---|---------------|---------------|---------------|
| 6 | 0.82880634  | -1.53743660 | 0.16384704  | 6 | 0.6685919123  | -1.6875716407 | 0.1865341822  |
| 6 | 0.95800656  | -2.94004583 | 0.38554347  | 6 | 0.6570372986  | -3.0810677667 | 0.4975085883  |
| 6 | -0.58131725 | 0.47705716  | 0.17934997  | 6 | -0.5148127483 | 0.4499508976  | 0.0669516042  |
| 6 | 0.59407556  | 1.26604319  | 0.01958379  | 6 | 0.7056716831  | 1.0903510235  | -0.1891833873 |
| 6 | 1.87314403  | 0.64051342  | -0.05214262 | 6 | 1.9149043171  | 0.3352863938  | -0.2358165163 |
| 6 | 1.98970592  | -0.71187359 | 0.12131289  | 6 | 1.9048230236  | -0.9912584040 | 0.0436597254  |
| 6 | -1.78044498 | 1.15684092  | 0.64732558  | 6 | -1.6433548056 | 1.2823751874  | 0.4652806156  |
| 6 | -1.83518088 | 2.58940411  | 0.60999203  | 6 | -1.5743181906 | 2.6800566929  | 0.2643544328  |
| 6 | -0.68145406 | 3.33321381  | 0.21368480  | 6 | -0.3583874200 | 3.2689249434  | -0.2132827622 |
| 6 | 0.50446242  | 2.69330072  | -0.00773093 | 6 | 0.7500040535  | 2.5128706388  | -0.3662405398 |
| 6 | -2.85881376 | 0.48189026  | 1.27390456  | 6 | -2.7710092176 | 0.7769644653  | 1.1568663462  |
| 6 | -3.96859717 | 1.16392267  | 1.74191570  | 6 | -3.8173809838 | 1.5910011312  | 1.5124697235  |
| 6 | -4.06164932 | 2.56308198  | 1.60200119  | 6 | -3.7891875442 | 2.9624967098  | 1.2035045581  |
| 6 | -3.00051379 | 3.26087379  | 1.05710614  | 6 | -2.6757390849 | 3.4961063250  | 0.6085971356  |
| 6 | -2.58010221 | -4.06704712 | 0.11778045  | 6 | -2.9840240931 | -3.8232762762 | 0.3864490193  |
| 1 | -0.07446275 | -4.78908253 | 0.73275888  | 1 | -0.5378504661 | -4.7749205642 | 0.9832612598  |
| 6 | -2.76432014 | -1.48905838 | -1.04200852 | 6 | -2.9100135161 | -1.3321340650 | -0.9182321381 |
| 1 | 1.95487905  | -3.35065126 | 0.55389035  | 1 | 1.6054503226  | -3.5811699046 | 0.6711445629  |
| 1 | 2.75750732  | 1.26993561  | -0.16369881 | 1 | 2.8483046798  | 0.8590804215  | -0.4209095945 |
| 1 | 2.96929169  | -1.18675232 | 0.19499905  | 1 | 2.8308227590  | -1.5536302317 | 0.1197012575  |
| 1 | -0.74697202 | 4.42181349  | 0.17070115  | 1 | -0.3288824855 | 4.3427673078  | -0.3755926167 |
| 1 | 1.41501164  | 3.26120901  | -0.20703734 | 1 | 1.6983631463  | 2.9635742566  | -0.6447234459 |
| 1 | -2.79732037 | -0.59299749 | 1.42238152  | 1 | -2.8005755328 | -0.2673722590 | 1.4394459961  |
| 1 | -4.77083302 | 0.61136121  | 2.23222542  | 1 | -4.6673353837 | 1.1702749377  | 2.0403749507  |
| 1 | -4.94643688 | 3.09263611  | 1.95698023  | 1 | -4.6260807980 | 3.5999080782  | 1.4708589613  |
| 1 | -3.02713919 | 4.35068274  | 0.99666411  | 1 | -2.6112691678 | 4.5637806487  | 0.4164544305  |
| 6 | -3.93036675 | -2.28472304 | -0.82479066 | 6 | -4.1344330390 | -1.9595780353 | -0.6357869770 |
| 6 | -3.80943251 | -3.57756686 | -0.23192605 | 6 | -4.1465482342 | -3.2240132775 | 0.0317186158  |
| 1 | -2.46366024 | -5.09196758 | 0.47371745  | 1 | -2.9764627725 | -4.8260382079 | 0.8036503727  |
| 6 | -2.88094783 | -0.36079344 | -1.94849396 | 6 | -2.9051943304 | -0.2484606175 | -1.8830780157 |
| 6 | -5.21377516 | -1.78128088 | -1.18866432 | 6 | -5.3571950490 | -1.3199422284 | -1.0015220083 |
| 1 | -4.70967770 | -4.18291521 | -0.11434011 | 1 | -5.1012644101 | -3.7160415985 | 0.1938239432  |
| 6 | -4.18140221 | 0.20991945  | -2.11293173 | 6 | -4.1091180215 | 0.4584510283  | -2.0589493982 |
| 6 | -5.33744621 | -0.52373946 | -1.71489990 | 6 | -5.3377554669 | -0.1007360201 | -1.5931376900 |
| 6 | -1.79733300 | 0.22175919  | -2.71528482 | 6 | -1.7586845625 | 0.1624321181  | -2.6683529136 |
| 1 | -6.09277248 | -2.39396691 | -0.98200101 | 1 | -6.2954027778 | -1.7975495835 | -0.7341294467 |
| 6 | -4.32198811 | 1.50688326  | -2.68663788 | 6 | -4.0982682909 | 1.7339265437  | -2.6953305412 |

|      |                                                                                                                                                                                                                                                                                                                                                                                                                                                                                                                                                                                                                                                                                                                                                                                                                  |                                                                                                                                                                                                                                                                                                                                                                                                                                                                                                                                                                                                                                                                                                                                                                                                                                                                                                                                               |
|------|------------------------------------------------------------------------------------------------------------------------------------------------------------------------------------------------------------------------------------------------------------------------------------------------------------------------------------------------------------------------------------------------------------------------------------------------------------------------------------------------------------------------------------------------------------------------------------------------------------------------------------------------------------------------------------------------------------------------------------------------------------------------------------------------------------------|-----------------------------------------------------------------------------------------------------------------------------------------------------------------------------------------------------------------------------------------------------------------------------------------------------------------------------------------------------------------------------------------------------------------------------------------------------------------------------------------------------------------------------------------------------------------------------------------------------------------------------------------------------------------------------------------------------------------------------------------------------------------------------------------------------------------------------------------------------------------------------------------------------------------------------------------------|
|      | 1 -6.31992674 -0.08337214 -1.89235973<br>6 -3.22106862 2.20267844 -3.10668206<br>6 -1.94915783 1.56218672 -3.17333651<br>6 -0.62157625 -0.50700861 -3.16850996<br>1 -5.32023382 1.94285011 -2.74969006<br>1 -3.31113338 3.22597313 -3.47476053<br>6 -0.84175754 2.25219941 -3.75943327<br>6 0.34861594 1.62107766 -3.98237824<br>6 -0.54808640 -1.92306471 -3.18884373<br>1 -0.97506285 3.30140328 -4.02905703<br>1 1.19625235 2.15912414 -4.41040182<br>6 0.46919203 0.21561998 -3.75545883<br>6 1.62156105 -0.48350760 -4.19378471<br>1 0.58396262 -3.67571878 -3.67625856<br>1 2.57059884 -2.39020729 -4.49153376<br>1 -1.40521502 -2.50348735 -2.85765076<br>1 2.44846416 0.09145463 -4.61532927                                                                                                             | 1 -6.2585579985 0.4440792474 -1.7803401670<br>6 -2.9351170068 2.2597969641 -3.1507260778<br>6 -1.7502104385 1.4667245071 -3.1831856519<br>6 -0.6636252303 -0.7214564229 -3.0491683002<br>1 -5.0299074908 2.2875633698 -2.7665000302<br>1 -2.9030360489 3.2623634716 -3.5672480566<br>6 -0.5611748912 1.9959644612 -3.7848339321<br>6 0.5414440914 1.2321533888 -3.9418384340<br>6 -0.7488332344 -2.1332041344 -2.9801169326<br>1 -0.5679126637 3.0340264567 -4.1049758323<br>1 1.4498777466 1.6435938800 -4.3726996414<br>6 0.5002875544 -0.1660810058 -3.6297224018<br>6 1.5828840867 -1.0062660918 -3.9761275575<br>1 0.2020539529 -4.0136940737 -3.2891920983<br>1 2.3298305895 -3.0037917152 -4.1026038222<br>1 -1.6699372040 -2.5949596434 -2.6491203957<br>1 2.4778958362 -0.5536260336 -4.3945366100                                                                                                                                   |
| [10] | 6 0.69772136 -2.58770919 -3.70300913<br>6 1.85824871 -1.77011263 -3.86290383<br>6 -1.35419774 -3.18515801 0.08409303<br>6 -0.05940450 -3.68388796 0.41315621<br>6 -1.50679874 -1.83272779 -0.34725565<br>6 -0.41990528 -0.91222852 -0.06354345<br>6 0.88642216 -1.47418702 0.08514650<br>6 1.03929770 -2.87530661 0.30508015<br>6 -0.55459702 0.51854783 0.13316448<br>6 0.60753220 1.32732034 -0.02631844<br>6 1.89532435 0.72233742 -0.11186077<br>6 2.03370929 -0.63023823 0.04229648<br>6 -1.75886536 1.17742491 0.61944431<br>6 -1.83665371 2.60925698 0.59057063<br>6 -0.69743651 3.37380099 0.19255365<br>6 0.49684584 2.75328445 -0.03864618<br>6 -2.81693077 0.48384115 1.26077616<br>6 -3.93161225 1.14623272 1.74489176<br>6 -4.05152416 2.54373670 1.60688972<br>6 -3.00857973 3.26010919 1.05153465 | C -0.3135893823 -3.6345633115 -2.8608249028<br>6 0.6609033365 -3.1793136218 -3.8080657136<br>6 -0.6663771701 -2.2502804503 0.9925314729<br>6 0.6586158421 -2.7804157493 0.9621195333<br>6 -1.0285356146 -1.2252668001 0.1033837491<br>6 0.0340303486 -0.4882118768 -0.5578836520<br>6 1.2732755925 -1.1403494798 -0.7029645279<br>6 1.5596197803 -2.3092828870 0.0674256816<br>6 -0.0769573607 0.8676485034 -1.0613298805<br>6 0.8396238095 1.2863935364 -2.0370928787<br>6 1.9919622237 0.4968944692 -2.3234444746<br>6 2.2451585239 -0.6275260778 -1.6106352642<br>6 -1.0126951815 1.8632055759 -0.5505408034<br>6 -1.1999857267 3.0678127219 -1.2668644179<br>6 -0.3775999956 3.3519321683 -2.4056032482<br>6 0.6427872103 2.5282074010 -2.7273353755<br>6 -1.6610380534 1.7438588749 0.7032282176<br>6 -2.5396691721 2.6984914070 1.1502147685<br>6 -2.8120184034 3.8374624375 0.3707992959<br>6 -2.1352754032 4.0226448343 -0.8064000351 |

|   |             |             |             |   |               |               |               |
|---|-------------|-------------|-------------|---|---------------|---------------|---------------|
| 6 | -2.49846482 | -4.03136396 | 0.18509695  | 6 | -1.6290412149 | -2.7590743279 | 1.9182676502  |
| 1 | 0.03939377  | -4.73286963 | 0.69657958  | 1 | 0.9037436363  | -3.6054990018 | 1.6243286946  |
| 6 | -2.74040842 | -1.48496330 | -1.02535403 | 6 | -2.4429012323 | -0.9838927081 | -0.0963173170 |
| 1 | 2.04509759  | -3.27262211 | 0.45045781  | 1 | 2.5391434647  | -2.7675856775 | -0.0327409600 |
| 1 | 2.76942039  | 1.36683619  | -0.21943241 | 1 | 2.6959650423  | 0.8526480716  | -3.0704556409 |
| 1 | 3.02104902  | -1.09068656 | 0.10388795  | 1 | 3.1692527751  | -1.1811849842 | -1.7492961072 |
| 1 | -0.77976936 | 4.46159363  | 0.15869264  | 1 | -0.5432421841 | 4.2766805575  | -2.9511850686 |
| 1 | 1.39811325  | 3.33627224  | -0.23692784 | 1 | 1.3310820700  | 2.7807638760  | -3.5290470994 |
| 1 | -2.73476338 | -0.58964980 | 1.40818715  | 1 | -1.4425945164 | 0.8940448954  | 1.3365768103  |
| 1 | -4.71664190 | 0.57945031  | 2.24677086  | 1 | -3.0160994502 | 2.5773755273  | 2.1178541511  |
| 1 | -4.94112110 | 3.05749393  | 1.97288287  | 1 | -3.5232134534 | 4.5803025272  | 0.7179391894  |
| 1 | -3.05346894 | 4.34954643  | 0.99480224  | 1 | -2.2865611813 | 4.9247995794  | -1.3930909397 |
| 6 | -3.89312792 | -2.27885365 | -0.74598616 | 6 | -3.3247866822 | -1.3519922560 | 0.9316666154  |
| 6 | -3.74414444 | -3.55225921 | -0.11980397 | 6 | -2.8843541744 | -2.2495156803 | 1.9522167526  |
| 1 | -2.36377025 | -5.04661655 | 0.56158078  | 1 | -1.3149243560 | -3.5170964721 | 2.6298492419  |
| 6 | -2.89160681 | -0.39181986 | -1.96591103 | 6 | -3.0069338837 | -0.3879222700 | -1.2901525887 |
| 6 | -5.18983746 | -1.79590893 | -1.09409308 | 6 | -4.6536005804 | -0.8275771035 | 0.9446619516  |
| 1 | -4.63649654 | -4.15563822 | 0.05469996  | 1 | -3.5943682802 | -2.5578134013 | 2.7142670191  |
| 6 | -4.19658470 | 0.16698086  | -2.11818600 | 6 | -4.2390372737 | 0.2737832885  | -1.1658117169 |
| 6 | -5.33731318 | -0.56050259 | -1.66531157 | 6 | -5.0549831450 | 0.0406116568  | -0.0157752892 |
| 6 | -1.82318330 | 0.17181125  | -2.77194834 | 6 | -2.3803286994 | -0.4236029851 | -2.5988517633 |
| 1 | -6.05893230 | -2.40559554 | -0.84157652 | 1 | -5.3095168370 | -1.0888840350 | 1.7701671600  |
| 6 | -4.35409403 | 1.44885421  | -2.72282910 | 6 | -4.6624154801 | 1.1793522000  | -2.1851201648 |
| 1 | -6.32754374 | -0.13450085 | -1.83436394 | 1 | -6.0273288266 | 0.5215826088  | 0.0366066263  |
| 6 | -3.25853062 | 2.15126419  | -3.14599347 | 6 | -3.8754019935 | 1.4071583184  | -3.2641531393 |
| 6 | -1.97677958 | 1.52743077  | -3.19966602 | 6 | -2.7217956226 | 0.5982754401  | -3.5039744195 |
| 6 | -0.64171857 | -0.53822339 | -3.22368360 | 6 | -1.4472458444 | -1.4398474814 | -3.0460128534 |
| 1 | -5.35602808 | 1.87591684  | -2.78754306 | 1 | -5.5922759830 | 1.7226301349  | -2.0448496054 |
| 1 | -3.35492539 | 3.17482233  | -3.51162481 | 1 | -4.1381071946 | 2.1639836522  | -3.9974703310 |
| 6 | -0.85522723 | 2.24540210  | -3.70662761 | 6 | -1.9207733724 | 0.8155790997  | -4.6634080245 |
| 6 | 0.36612886  | 1.63820684  | -3.81616735 | 6 | -0.8390314087 | 0.0353322487  | -4.9057598200 |
| 6 | -0.57259548 | -1.97701466 | -3.43815970 | 6 | -1.4055757623 | -2.8015080521 | -2.5264088858 |
| 1 | -0.98714077 | 3.29482269  | -3.97488618 | 1 | -2.1694326346 | 1.6449034605  | -5.3191551743 |
| 1 | 1.24562263  | 2.20083761  | -4.13386011 | 1 | -0.1798849633 | 0.2405049087  | -5.7445933244 |
| 6 | 0.48942715  | 0.23161237  | -3.62097716 | 6 | -0.6013232632 | -1.1318579120 | -4.1208695514 |
| 6 | 1.73946154  | -0.40993640 | -3.88860893 | 6 | 0.4809153831  | -2.0101674303 | -4.4596671947 |
| 6 | 0.77699900  | -3.98880720 | -3.90360808 | 6 | -0.2411963249 | -4.9443284844 | -2.3337199383 |

|      |                                                                                                                                                                                                                                                                                                                                                                                                                                                                                                                                                                                                                                                                                                                                                                                                                                                                                                                                                                                                                                                                                                                                                |                                                                                                                                                                                                                                                                                                                                                                                                                                                                                                                                                                                                                                                                                                                                                                                                                                                                                                                                                                                                                                                                                                                                                                                                                                                                                                                             |
|------|------------------------------------------------------------------------------------------------------------------------------------------------------------------------------------------------------------------------------------------------------------------------------------------------------------------------------------------------------------------------------------------------------------------------------------------------------------------------------------------------------------------------------------------------------------------------------------------------------------------------------------------------------------------------------------------------------------------------------------------------------------------------------------------------------------------------------------------------------------------------------------------------------------------------------------------------------------------------------------------------------------------------------------------------------------------------------------------------------------------------------------------------|-----------------------------------------------------------------------------------------------------------------------------------------------------------------------------------------------------------------------------------------------------------------------------------------------------------------------------------------------------------------------------------------------------------------------------------------------------------------------------------------------------------------------------------------------------------------------------------------------------------------------------------------------------------------------------------------------------------------------------------------------------------------------------------------------------------------------------------------------------------------------------------------------------------------------------------------------------------------------------------------------------------------------------------------------------------------------------------------------------------------------------------------------------------------------------------------------------------------------------------------------------------------------------------------------------------------------------|
|      | 1 2.82020354 -2.25227690 -4.04563046<br>6 -1.72240651 -2.80078173 -3.54476237<br>1 2.60089755 0.22001280 -4.11788654<br>6 -0.36131847 -4.77170944 -3.93050742<br>6 -1.62287831 -4.15942478 -3.78724170<br>1 1.75898004 -4.43333387 -4.07745504<br>1 -2.70716667 -2.34798121 -3.46768188<br>1 -0.28856307 -5.84619522 -4.10213614<br>1 -2.53108859 -4.75626707 -3.87842870                                                                                                                                                                                                                                                                                                                                                                                                                                                                                                                                                                                                                                                                                                                                                                      | 1 1.4990671357 -3.8285738618 -4.0451320935<br>6 -2.4740056206 -3.3867674110 -1.8037200977<br>1 1.1655098752 -1.7013367452 -5.2447564301<br>6 -1.2548374707 -5.4530702775 -1.5644513124<br>6 -2.4022841470 -4.6729982606 -1.3317419790<br>1 0.6248837946 -5.5540391490 -2.5769788285<br>1 -3.3810651275 -2.8189745877 -1.6422513411<br>1 -1.1963050542 -6.4641896402 -1.1743963612<br>1 -3.2432321199 -5.0926290076 -0.7888887886                                                                                                                                                                                                                                                                                                                                                                                                                                                                                                                                                                                                                                                                                                                                                                                                                                                                                            |
| [11] | 6 0.73821557 -2.57980609 -3.68130493<br>6 1.91027498 -1.77259207 -3.80820751<br>6 -1.39866161 -3.21454382 -0.02808839<br>6 -0.11554771 -3.72647381 0.32920763<br>6 -1.53500688 -1.84573078 -0.40667826<br>6 -0.45933363 -0.94131583 -0.04866278<br>6 0.84074670 -1.50524890 0.12769513<br>6 0.98589629 -2.91461730 0.30010852<br>6 -0.60791069 0.48538536 0.18294974<br>6 0.55694944 1.29799712 0.01712343<br>6 1.84874952 0.69444811 -0.01474836<br>6 1.98688352 -0.65741408 0.14603968<br>6 -1.82076240 1.14931500 0.62351853<br>6 -1.93905175 2.54993510 0.38956159<br>6 -0.79982090 3.30824161 -0.00829864<br>6 0.42981997 2.71332097 -0.08796872<br>6 -2.86509323 0.52256870 1.42198622<br>6 -4.10035372 1.21924901 1.63533390<br>6 -4.25184345 2.55741596 1.15806770<br>6 -3.18400359 3.21615529 0.61919403<br>6 -2.54822040 -4.05801439 0.00759010<br>1 -0.02590745 -4.78639221 0.57218254<br>6 -2.75131679 -1.46008050 -1.09085763<br>1 1.98534620 -3.31828523 0.46963215<br>1 2.72298789 1.34137690 -0.10471415<br>1 2.97302341 -1.11526561 0.23817524<br>1 -0.91489041 4.38232279 -0.16375071<br>1 1.32940114 3.30459929 -0.26686922 | 6 0.1564743397 -2.9505070447 -3.6300042779<br>6 1.3711835558 -2.2720467429 -3.9739120224<br>6 -1.4463209326 -3.1389773332 0.1019317968<br>6 -0.1626527815 -3.7447699578 0.2644084661<br>6 -1.5323644773 -1.8110907092 -0.3418629095<br>6 -0.3452000838 -0.9868277069 -0.2601428416<br>6 0.8984468397 -1.6390462113 -0.2704424768<br>6 0.9638014196 -3.0439330259 -0.0149704671<br>6 -0.3581009592 0.4627732549 -0.1549793649<br>6 0.7913990106 1.1485321946 -0.5891062189<br>6 2.0149873247 0.4366865091 -0.7851241219<br>6 2.0868451763 -0.8917455043 -0.5320183619<br>6 -1.4503100040 1.2526955423 0.3820097795<br>6 -1.5210502043 2.6065009662 0.0224612536<br>6 -0.4139646176 3.2380933159 -0.6162552134<br>6 0.7376431568 2.5537501634 -0.8206218924<br>6 -2.4156278730 0.7719090579 1.3648928458<br>6 -3.5635430476 1.5485615944 1.6445202166<br>6 -3.7031744420 2.8469968360 1.0535912104<br>6 -2.6910692493 3.3758541629 0.3336137092<br>6 -2.6429235872 -3.8617269376 0.3973656096<br>1 -0.1144621531 -4.7886755169 0.5601815506<br>6 -2.8123200059 -1.3433095486 -0.8258962389<br>1 1.9402284743 -3.5188109805 0.0106917622<br>1 2.8981421289 0.9973475746 -1.0782015583<br>1 3.0343785272 -1.4199744926 -0.5852184751<br>1 -0.4872435178 4.2933308473 -0.8641134161<br>1 1.6223771774 3.0481919052 -1.2112341621 |

|   |             |             |             |   |               |               |               |
|---|-------------|-------------|-------------|---|---------------|---------------|---------------|
| 6 | -2.67337251 | -0.68969291 | 2.13267660  | 6 | -2.1972631152 | -0.3799826281 | 2.1594512572  |
| 6 | -5.12513351 | 0.61508888  | 2.40609550  | 6 | -4.5168272275 | 1.0840715619  | 2.5791667540  |
| 1 | -5.20545101 | 3.06583405  | 1.31099010  | 1 | -4.6002055916 | 3.4226776477  | 1.2639158397  |
| 1 | -3.25683737 | 4.27279186  | 0.35503468  | 1 | -2.7434606351 | 4.3953292770  | -0.0380990484 |
| 6 | -3.91516948 | -2.25283384 | -0.86170036 | 6 | -3.9657317379 | -1.9828614729 | -0.3491855963 |
| 6 | -3.78549004 | -3.55459952 | -0.29355496 | 6 | -3.8526747725 | -3.2594332837 | 0.2821475153  |
| 1 | -2.42709827 | -5.09134293 | 0.33665168  | 1 | -2.5594200318 | -4.8745979986 | 0.7806614010  |
| 6 | -2.86903191 | -0.34950665 | -2.01595640 | 6 | -2.9726088768 | -0.2729600139 | -1.7880157671 |
| 6 | -5.20006657 | -1.74497807 | -1.21849930 | 6 | -5.2373352431 | -1.3531701174 | -0.5150450128 |
| 1 | -4.68486547 | -4.15829802 | -0.16167404 | 1 | -4.7603031199 | -3.7600619017 | 0.6068324782  |
| 6 | -4.16584301 | 0.22132431  | -2.19420767 | 6 | -4.1945982784 | 0.4187113472  | -1.7882434913 |
| 6 | -5.32287741 | -0.49751505 | -1.76817930 | 6 | -5.3271186895 | -0.1441670729 | -1.1214534041 |
| 6 | -1.78011453 | 0.20126571  | -2.80464268 | 6 | -1.9649195502 | 0.1187879462  | -2.7589693290 |
| 1 | -6.08028364 | -2.34925532 | -0.99361557 | 1 | -6.1154137624 | -1.8312830974 | -0.0907839965 |
| 6 | -4.30075932 | 1.49964774  | -2.81120324 | 6 | -4.2960582543 | 1.6758984713  | -2.4573915049 |
| 1 | -6.30495787 | -0.05739406 | -1.94809210 | 1 | -6.2735067014 | 0.3868973414  | -1.1669278651 |
| 6 | -3.19266915 | 2.18754196  | -3.22515559 | 6 | -3.2169310284 | 2.2058260817  | -3.0811520228 |
| 6 | -1.91528738 | 1.55371642  | -3.24877453 | 6 | -2.0287803855 | 1.4319466546  | -3.2610882850 |
| 6 | -0.59437644 | -0.51945025 | -3.22950745 | 6 | -0.9159452540 | -0.7462241674 | -3.2648193559 |
| 1 | -5.29769659 | 1.93483496  | -2.89685392 | 1 | -5.2344051365 | 2.2197087313  | -2.3996516968 |
| 1 | -3.27433848 | 3.20742750  | -3.60471129 | 1 | -3.2527121850 | 3.2035930692  | -3.5091429232 |
| 6 | -0.77954793 | 2.25919485  | -3.74145198 | 6 | -0.9129994725 | 1.9836806019  | -3.9551898472 |
| 6 | 0.44108841  | 1.64533412  | -3.81592822 | 6 | 0.2092884941  | 1.2471557885  | -4.1435150775 |
| 6 | -0.53268361 | -1.95824361 | -3.44643092 | 6 | -1.0059802480 | -2.2004074364 | -3.3378265277 |
| 1 | -0.89992648 | 3.30630279  | -4.02418327 | 1 | -0.9650334398 | 3.0159979081  | -4.2889271391 |
| 1 | 1.33069718  | 2.19987273  | -4.11946821 | 1 | 1.0923210587  | 1.6822013809  | -4.6030851448 |
| 6 | 0.55141670  | 0.24026304  | -3.60427070 | 6 | 0.2175439407  | -0.1435313897 | -3.8303725892 |
| 6 | 1.80318999  | -0.41163003 | -3.83807778 | 6 | 1.3761630928  | -0.9319473922 | -4.1366952943 |
| 6 | 0.80932105  | -3.98036170 | -3.88784313 | 6 | 0.0918332941  | -4.3616580749 | -3.6716054975 |
| 1 | 2.87222314  | -2.26339221 | -3.96639037 | 1 | 2.2593091766  | -2.8634558844 | -4.1783700849 |
| 6 | -1.68718469 | -2.76991010 | -3.58699727 | 6 | -2.2319869098 | -2.9046149115 | -3.2573424913 |
| 1 | 2.67496371  | 0.21122389  | -4.04697371 | 1 | 2.2649736172  | -0.4193103077 | -4.4940417596 |
| 6 | -0.33550352 | -4.75179720 | -3.95027947 | 6 | -1.0994474563 | -5.0193770113 | -3.5084053859 |
| 6 | -1.59421527 | -4.12823629 | -3.83590174 | 6 | -2.2794877293 | -4.2738533462 | -3.3346537191 |
| 1 | 1.79122531  | -4.43349075 | -4.03856945 | 1 | 1.0057166541  | -4.9166242277 | -3.8662943497 |
| 1 | -2.66970515 | -2.30904937 | -3.53117537 | 1 | -3.1580969654 | -2.3537147932 | -3.1586275248 |
| 1 | -0.26856750 | -5.82586479 | -4.12695885 | 1 | -1.1389610885 | -6.1031959202 | -3.5510645634 |

|      |                                                                                                                                                                                                                                                                                                                                                                                                                                                                                                                                                                                                                                                                                                                                                                                                                                                                                                                                                                                                                                                                                                                                                                                                           |                                                                                                                                                                                                                                                                                                                                                                                                                                                                                                                                                                                                                                                                                                                                                                                                                                                                                                                                                                                                                                                                                                                                                                                                                                                                                                                                                                                                 |
|------|-----------------------------------------------------------------------------------------------------------------------------------------------------------------------------------------------------------------------------------------------------------------------------------------------------------------------------------------------------------------------------------------------------------------------------------------------------------------------------------------------------------------------------------------------------------------------------------------------------------------------------------------------------------------------------------------------------------------------------------------------------------------------------------------------------------------------------------------------------------------------------------------------------------------------------------------------------------------------------------------------------------------------------------------------------------------------------------------------------------------------------------------------------------------------------------------------------------|-------------------------------------------------------------------------------------------------------------------------------------------------------------------------------------------------------------------------------------------------------------------------------------------------------------------------------------------------------------------------------------------------------------------------------------------------------------------------------------------------------------------------------------------------------------------------------------------------------------------------------------------------------------------------------------------------------------------------------------------------------------------------------------------------------------------------------------------------------------------------------------------------------------------------------------------------------------------------------------------------------------------------------------------------------------------------------------------------------------------------------------------------------------------------------------------------------------------------------------------------------------------------------------------------------------------------------------------------------------------------------------------------|
|      | 1 -2.50554562 -4.71577215 -3.95280647<br>6 -4.92638016 -0.60240191 3.02887154<br>6 -3.67291689 -1.23708785 2.91811442<br>1 -1.70696747 -1.18447304 2.08665872<br>1 -6.06606388 1.15443957 2.53219390<br>1 -5.71659279 -1.04873693 3.63358092<br>1 -3.48156786 -2.16309118 3.46151876                                                                                                                                                                                                                                                                                                                                                                                                                                                                                                                                                                                                                                                                                                                                                                                                                                                                                                                      | 1 -3.2381630426 -4.7789070927 -3.2726329297<br>6 -4.3119138198 -0.0764133821 3.2792667728<br>6 -3.1184676016 -0.7960396488 3.0874520371<br>1 -1.2710507956 -0.9295082215 2.0540498399<br>1 -5.4045956498 1.6854071730 2.7561014442<br>1 -5.0440755409 -0.4156493049 4.0052085939<br>1 -2.9166382758 -1.6804711191 3.6833791663                                                                                                                                                                                                                                                                                                                                                                                                                                                                                                                                                                                                                                                                                                                                                                                                                                                                                                                                                                                                                                                                  |
| [12] | 6 2.52457023 -1.69858301 -2.51154041<br>6 3.69963741 -0.89724433 -2.60532832<br>6 0.39826185 -2.26796770 0.91451716<br>6 1.67389894 -2.76762843 1.31267989<br>6 0.26462486 -0.90620804 0.50962549<br>6 1.33101165 0.00833446 0.87251180<br>6 2.62823892 -0.54754531 1.09128487<br>6 2.77293754 -1.95206070 1.29779828<br>6 1.17561102 1.43900430 1.07630849<br>6 2.34148932 2.25137568 0.91497302<br>6 3.63500881 1.65115380 0.92491293<br>6 3.77154827 0.30377081 1.12033165<br>6 -0.04226325 2.10877895 1.49487722<br>6 -0.15954062 3.50548148 1.23789704<br>6 0.98132807 4.25793886 0.83298844<br>6 2.21271181 3.66400051 0.77827048<br>6 -1.08966815 1.49473619 2.29917860<br>6 -2.32354927 2.19726777 2.50229073<br>6 -2.47305512 3.52777362 2.00379705<br>6 -1.40445650 4.17610788 1.45392311<br>6 -0.75122052 -3.11236334 0.95207840<br>1 1.76086819 -3.82227802 1.57876158<br>6 -0.95329708 -0.52952778 -0.17678031<br>1 3.76882553 -2.34807444 1.50327361<br>1 4.50966263 2.29832673 0.84064072<br>1 4.75610113 -0.14943419 1.24679208<br>1 0.86583769 5.32867718 0.65620834<br>1 3.11347556 4.25350285 0.59919626<br>6 -0.90278566 0.29072386 3.02514005<br>6 -3.34969544 1.60722446 3.28189921 | 6 1.9970743462 -1.9703573137 -2.6295003446<br>6 3.2308256599 -1.3116619693 -2.9086171606<br>6 0.3849482940 -2.2686476372 0.8553645503<br>6 1.6629022194 -2.8825671055 1.0324495525<br>6 0.3132405502 -0.9247934394 0.4583227539<br>6 1.5017222608 -0.1076127506 0.6001455628<br>6 2.7436714839 -0.7625674034 0.6032749447<br>6 2.7983864547 -2.1755721595 0.8128567607<br>6 1.4921980501 1.3378266528 0.7532705801<br>6 2.6540985065 2.0328928839 0.3692183225<br>6 3.8805047389 1.3237449804 0.1841195912<br>6 3.9409425480 -0.0120536539 0.3984287841<br>6 0.3952138593 2.1151513385 1.3002468445<br>6 0.3380390367 3.4809898617 0.9868569034<br>6 1.4570667545 4.1273414844 0.3839585897<br>6 2.6094580732 3.4449475612 0.1793905492<br>6 -0.5844799269 1.6083796793 2.2556487274<br>6 -1.7272321445 2.3865103632 2.5529627752<br>6 -1.8512792755 3.7050120572 2.0051722705<br>6 -0.8290312534 4.2486320328 1.3113197722<br>6 -0.8205996839 -2.9967616728 1.0999732599<br>1 1.7012028824 -3.9370644163 1.2901457422<br>6 -0.9588439126 -0.4300499677 -0.0176580104<br>1 3.7729437966 -2.6537968810 0.8522182363<br>1 4.7728252333 1.8903662097 -0.0668070927<br>1 4.8880475100 -0.5421405643 0.3554344050<br>1 1.3919772318 5.1906599189 0.1706578832<br>1 3.5036395257 3.9475360479 -0.1779436182<br>6 -0.3869009641 0.4255047860 3.0092990522<br>6 -2.6916727301 1.9012227490 3.4650050658 |

|   |             |             |             |   |               |               |               |
|---|-------------|-------------|-------------|---|---------------|---------------|---------------|
| 1 | -3.42598867 | 4.03992319  | 2.14844108  | 1 | -2.7456487181 | 4.2806896653  | 2.2267272702  |
| 1 | -1.47601533 | 5.22827530  | 1.17208958  | 1 | -0.8709155412 | 5.2794540958  | 0.9707875281  |
| 6 | -2.11896682 | -1.31166923 | 0.07415524  | 6 | -2.1217336634 | -1.0790751958 | 0.4180860667  |
| 6 | -1.98827553 | -2.61106467 | 0.64792436  | 6 | -2.0259613237 | -2.3849147427 | 0.9895339382  |
| 1 | -0.63063622 | -4.14220762 | 1.29197752  | 1 | -0.7481645848 | -4.0251045288 | 1.4423884023  |
| 6 | -1.07882130 | 0.57998019  | -1.09852457 | 6 | -1.1049467720 | 0.6941748080  | -0.9150458019 |
| 6 | -3.40523124 | -0.78760409 | -0.25080374 | 6 | -3.3832575806 | -0.4217177750 | 0.2841848799  |
| 1 | -2.88759112 | -3.21309972 | 0.78631741  | 1 | -2.9409766991 | -2.8965665756 | 1.2731588262  |
| 6 | -2.37141323 | 1.16417730  | -1.25382674 | 6 | -2.3131693569 | 1.4052628411  | -0.8825782726 |
| 6 | -3.52608061 | 0.46264872  | -0.79522508 | 6 | -3.4539289789 | 0.8240915887  | -0.2470133524 |
| 6 | -0.00447954 | 1.10176325  | -1.92241549 | 6 | -0.1010089253 | 1.0984923399  | -1.8790680102 |
| 1 | -4.28743505 | -1.38085747 | -0.00558014 | 1 | -4.2694270892 | -0.9107291864 | 0.6779816271  |
| 6 | -2.50479603 | 2.43033242  | -1.89765108 | 6 | -2.3918102868 | 2.6867953181  | -1.5094066482 |
| 1 | -4.50675011 | 0.91545808  | -0.94983006 | 1 | -4.3926795334 | 1.3705678801  | -0.2608107036 |
| 6 | -1.39943087 | 3.09379673  | -2.35725379 | 6 | -1.3078940426 | 3.2152254717  | -2.1283546605 |
| 6 | -0.12936810 | 2.44424915  | -2.39335108 | 6 | -0.1354902655 | 2.4241827535  | -2.3401961381 |
| 6 | 1.16735780  | 0.35308230  | -2.34521699 | 6 | 0.9214110587  | 0.2159301413  | -2.4142278161 |
| 1 | -3.49773574 | 2.87720990  | -1.96850061 | 1 | -3.3178855796 | 3.2483872548  | -1.4266088421 |
| 1 | -1.47854960 | 4.10494089  | -2.75995660 | 1 | -1.3290718345 | 4.2257692892  | -2.5263552360 |
| 6 | 1.01028097  | 3.12465239  | -2.91393161 | 6 | 0.9978447783  | 2.9681926413  | -3.0165844258 |
| 6 | 2.22868252  | 2.50308323  | -2.95160174 | 6 | 2.1099794634  | 2.2158808605  | -3.1976919405 |
| 6 | 1.23772454  | -1.08656836 | -2.51670456 | 6 | 0.8132706282  | -1.2278910116 | -2.5136104648 |
| 1 | 0.89879459  | 4.16365814  | -3.22820258 | 1 | 0.9705192116  | 4.0085515432  | -3.3275508452 |
| 1 | 3.12752938  | 3.04573941  | -3.24917912 | 1 | 3.0120139554  | 2.6454000190  | -3.6243099682 |
| 6 | 2.33448339  | 1.10597670  | -2.68608642 | 6 | 2.0932957533  | 0.8164196115  | -2.9104976511 |
| 6 | 3.59712648  | 0.45410064  | -2.79360056 | 6 | 3.2551254600  | 0.0228964357  | -3.1426318091 |
| 6 | 2.64480591  | -3.12374520 | -2.48498297 | 6 | 1.9654998862  | -3.4000923659 | -2.5220080896 |
| 1 | 4.67172861  | -1.39327538 | -2.61296248 | 1 | 4.1294656338  | -1.9129191434 | -3.0150775918 |
| 6 | 0.10320753  | -1.93641436 | -2.85081935 | 6 | -0.4459276267 | -1.9535300676 | -2.6360134041 |
| 1 | 4.48031902  | 1.06152296  | -2.99846148 | 1 | 4.1658169618  | 0.5167936953  | -3.4691109600 |
| 6 | 1.54568839  | -3.92975354 | -2.56794786 | 6 | 0.7971655939  | -4.0660267408 | -2.4012535941 |
| 6 | 0.25952852  | -3.36188579 | -2.82174587 | 6 | -0.4461332395 | -3.3629669783 | -2.5202562798 |
| 1 | 3.64523149  | -3.55281806 | -2.40321469 | 1 | 2.9128131812  | -3.9319935107 | -2.5310663265 |
| 6 | -1.12238359 | -1.42934036 | -3.35319805 | 6 | -1.6639475698 | -1.3299597179 | -2.9998974463 |
| 1 | 1.64266109  | -5.01616907 | -2.52798939 | 1 | 0.7777909212  | -5.1473473047 | -2.2982152228 |
| 6 | -0.83921945 | -4.19743204 | -3.14348769 | 6 | -1.6620539696 | -4.0772105668 | -2.6167265535 |
| 6 | -3.15492272 | 0.39769801  | 3.92117405  | 6 | -2.5045995141 | 0.7155868768  | 4.1266760610  |

|      |                                                                                                                                                                                                                                                                                                                                                                                                                                                                                                                                                                                                                                                                                                                                                                                                                                                                                                                                                                                                                                                                |                                                                                                                                                                                                                                                                                                                                                                                                                                                                                                                                                                                                                                                                                                                                                                                                                                                                                                                                                                                                                                                                                                                                                                                                                              |
|------|----------------------------------------------------------------------------------------------------------------------------------------------------------------------------------------------------------------------------------------------------------------------------------------------------------------------------------------------------------------------------------------------------------------------------------------------------------------------------------------------------------------------------------------------------------------------------------------------------------------------------------------------------------------------------------------------------------------------------------------------------------------------------------------------------------------------------------------------------------------------------------------------------------------------------------------------------------------------------------------------------------------------------------------------------------------|------------------------------------------------------------------------------------------------------------------------------------------------------------------------------------------------------------------------------------------------------------------------------------------------------------------------------------------------------------------------------------------------------------------------------------------------------------------------------------------------------------------------------------------------------------------------------------------------------------------------------------------------------------------------------------------------------------------------------------------------------------------------------------------------------------------------------------------------------------------------------------------------------------------------------------------------------------------------------------------------------------------------------------------------------------------------------------------------------------------------------------------------------------------------------------------------------------------------------|
|      | 6 -1.90403020 -0.24295937 3.81781483<br>1 -4.28905773 2.15109515 3.40020204<br>1 -3.94657493 -0.03794998 4.53177118<br>6 -2.04217672 -3.66433740 -3.56572342<br>6 -2.16603947 -2.26753354 -3.70512033<br>1 -1.23443830 -0.35803911 -3.49629784<br>1 -0.70172465 -5.27923918 -3.08892202<br>1 -2.87497520 -4.31850195 -3.82619715<br>1 -3.08769226 -1.83932805 -4.10075998<br>1 -1.71619797 -1.16344833 4.37166977<br>1 0.06114861 -0.20916691 2.98444057                                                                                                                                                                                                                                                                                                                                                                                                                                                                                                                                                                                                       | 6 -1.3189133277 -0.0116354064 3.9167659612<br>1 -3.5740343180 2.5062460969 3.6559440096<br>1 -3.2447803626 0.3608085991 4.8368981894<br>6 -2.8395227280 -3.4324852209 -2.8927027938<br>6 -2.8287461241 -2.0449918969 -3.1212468379<br>1 -1.6759898451 -0.2698138023 -3.2163824931<br>1 -1.6392037833 -5.1572684888 -2.4986533755<br>1 -3.7664012902 -3.9910685565 -2.9767671243<br>1 -3.7434776156 -1.5349037864 -3.4059218612<br>1 -1.1318739188 -0.9193704313 4.4816805027<br>1 0.5320917121 -0.1330701614 2.8890274747                                                                                                                                                                                                                                                                                                                                                                                                                                                                                                                                                                                                                                                                                                    |
| [13] | 6 0.69980812 -2.60647774 -3.42614818<br>6 1.87807512 -1.81213486 -3.53575850<br>6 -1.38355434 -3.15734220 0.02675230<br>6 -0.09618344 -3.67297387 0.35946766<br>6 -1.51976156 -1.79206312 -0.36298162<br>6 -0.43176037 -0.89275146 -0.03770658<br>6 0.86799008 -1.45977998 0.12309375<br>6 1.00949097 -2.86796951 0.30058986<br>6 -0.57215309 0.53128248 0.20533352<br>6 0.58756995 1.34617960 0.02884318<br>6 1.87934518 0.74153352 -0.01181434<br>6 2.01518464 -0.61175013 0.14108588<br>6 -1.78250587 1.18992627 0.66870350<br>6 -1.92248976 2.58186531 0.37130028<br>6 -0.78418756 3.34400845 -0.02562656<br>6 0.45248845 2.76129842 -0.08238103<br>6 -2.82623696 0.57829148 1.47077644<br>6 -4.10780525 1.20136392 1.48957229<br>6 -4.27525187 2.51262927 0.95683444<br>6 -3.19096899 3.21627426 0.50812912<br>6 -2.53930020 -3.99155402 0.09576599<br>1 -0.00729358 -4.73125887 0.60981196<br>6 -2.74735117 -1.40548027 -1.02646029<br>1 2.00990152 -3.27633810 0.45354375<br>1 2.75414872 1.38745153 -0.10343660<br>1 3.00149560 -1.07101774 0.22523460 | C 0.6442799706 -2.6212624208 -3.2643345238<br>6 1.8472644520 -1.8633178361 -3.3712582034<br>6 -1.3713940525 -3.1251964242 -0.0081189001<br>6 -0.0737375096 -3.6409325895 0.2947227786<br>6 -1.5065738941 -1.7834971297 -0.3893502272<br>6 -0.4092443514 -0.8850142018 -0.1077230502<br>6 0.8750897102 -1.4348725823 0.0131930130<br>6 1.0204734474 -2.8447197874 0.1986005045<br>6 -0.5644535171 0.5396450011 0.1098261046<br>6 0.5573447316 1.3553830595 -0.1088277053<br>6 1.8568862355 0.7643389981 -0.1823966915<br>6 2.0139310528 -0.5726581372 -0.0221330994<br>6 -1.7884184784 1.1743834310 0.5703053337<br>6 -1.9631613732 2.5341669876 0.2530437413<br>6 -0.8457275548 3.3164065644 -0.1725232381<br>6 0.3902656183 2.7671185643 -0.2437560163<br>6 -2.8229086812 0.5316544610 1.3602241744<br>6 -4.1025956075 1.1060726237 1.3635001041<br>6 -4.3044755984 2.4098328728 0.8224012882<br>6 -3.2501492537 3.1342897507 0.3756553422<br>6 -2.5375216579 -3.9466786191 0.0861840030<br>1 0.0216437700 -4.6949783328 0.5392819547<br>6 -2.7443140772 -1.3741555809 -1.0113272521<br>1 2.0198830172 -3.2516947904 0.3254890638<br>1 2.7160697247 1.4170739095 -0.3090067294<br>1 3.0048163866 -1.0157450228 0.0196214690 |



|   |             |             |             |   |               |               |               |
|---|-------------|-------------|-------------|---|---------------|---------------|---------------|
| 1 | -0.91159928 | 4.41187572  | -0.21108390 | 1 | -0.9989367769 | 4.3741056929  | -0.3680194790 |
| 1 | 1.34799290  | 3.35785198  | -0.26411194 | 1 | 1.2623692803  | 3.3765032487  | -0.4628990544 |
| 6 | -2.62110567 | -0.53659832 | 2.38563323  | 6 | -2.5954957960 | -0.6004457758 | 2.2521962792  |
| 6 | -5.21959257 | 0.54553229  | 2.10597110  | 6 | -5.2067525545 | 0.4094612133  | 1.9567821838  |
| 1 | -5.26489210 | 2.97104740  | 0.99698275  | 1 | -5.3038608666 | 2.8348241330  | 0.8499972452  |
| 1 | -3.28164649 | 4.26507139  | 0.22037441  | 1 | -3.3711111101 | 4.1673010720  | 0.0622693198  |
| 6 | -3.91227841 | -2.18484354 | -0.76232624 | 6 | -3.8962459511 | -2.1261478578 | -0.7433713530 |
| 6 | -3.77864528 | -3.48195577 | -0.18266314 | 6 | -3.7649811677 | -3.4297977244 | -0.1715628020 |
| 1 | -2.41905093 | -5.02170992 | 0.43436992  | 1 | -2.4272378789 | -4.9709039922 | 0.4304291109  |
| 6 | -2.87678456 | -0.30658215 | -1.96130729 | 6 | -2.8598768702 | -0.2505761042 | -1.9149685362 |
| 6 | -5.19926786 | -1.66823363 | -1.09474432 | 6 | -5.1782367002 | -1.5784755778 | -1.0556616353 |
| 1 | -4.67888737 | -4.07806826 | -0.02600320 | 1 | -4.6629366084 | -4.0181938231 | -0.0064696319 |
| 6 | -4.17109203 | 0.27173260  | -2.12575030 | 6 | -4.1182963295 | 0.3519366080  | -2.0540503139 |
| 6 | -5.32373142 | -0.42762274 | -1.65991044 | 6 | -5.2820397879 | -0.3368704844 | -1.5920257554 |
| 6 | -1.80627191 | 0.20775138  | -2.79558492 | 6 | -1.7714687132 | 0.2554110984  | -2.7275437129 |
| 1 | -6.07995987 | -2.26052642 | -0.84151083 | 1 | -6.0648572607 | -2.1500386994 | -0.7967912594 |
| 6 | -4.30816936 | 1.52887011  | -2.78639221 | 6 | -4.2197869368 | 1.6332512187  | -2.6784866773 |
| 1 | -6.30608892 | 0.01849846  | -1.82399762 | 1 | -6.2535021342 | 0.1270846973  | -1.7390116597 |
| 6 | -3.20436764 | 2.19299603  | -3.24878764 | 6 | -3.1084012392 | 2.2676899190  | -3.1258497879 |
| 6 | -1.93219495 | 1.54688096  | -3.27612853 | 6 | -1.8531735988 | 1.5847724371  | -3.1722274332 |
| 6 | -0.64217174 | -0.54702914 | -3.22974420 | 6 | -0.6187698587 | -0.5290787059 | -3.1388157094 |
| 1 | -5.30297804 | 1.97037148  | -2.86541176 | 1 | -5.1953954636 | 2.1078987648  | -2.7310698097 |
| 1 | -3.28612137 | 3.19984412  | -3.66165161 | 1 | -3.1599279886 | 3.2806723410  | -3.5148694775 |
| 6 | -0.79316264 | 2.22362685  | -3.80274749 | 6 | -0.6859107599 | 2.2355447798  | -3.6751982944 |
| 6 | 0.42317480  | 1.59840178  | -3.84652400 | 6 | 0.4987807200  | 1.5795216865  | -3.7130584005 |
| 6 | -0.58321404 | -1.98647881 | -3.40635920 | 6 | -0.5987411305 | -1.9724470482 | -3.2843365797 |
| 1 | -0.90391028 | 3.26196647  | -4.11964607 | 1 | -0.7559749027 | 3.2787696177  | -3.9697059042 |
| 1 | 1.32182324  | 2.13752627  | -4.15106297 | 1 | 1.4122373667  | 2.0909017880  | -4.0033952229 |
| 6 | 0.52455837  | 0.20006298  | -3.58478260 | 6 | 0.5566058661  | 0.1741707557  | -3.4608984355 |
| 6 | 1.78119910  | -0.45901355 | -3.71423841 | 6 | 1.7960180812  | -0.5226473625 | -3.5633241235 |
| 6 | 0.81196767  | -4.03237247 | -3.40748978 | 6 | 0.7113937154  | -4.0522161218 | -3.1915475693 |
| 1 | 2.84676433  | -2.31418514 | -3.56275892 | 1 | 2.7974984766  | -2.3900107022 | -3.3749485055 |
| 6 | -1.72823787 | -2.82895374 | -3.72438359 | 6 | -1.7733034574 | -2.7866085761 | -3.5765781286 |
| 1 | 2.66485095  | 0.14385782  | -3.93035388 | 1 | 2.6989881744  | 0.0497219605  | -3.7559827797 |
| 6 | -0.29309869 | -4.83165073 | -3.47270942 | 6 | -0.4087943638 | -4.8052427029 | -3.2241225480 |
| 6 | -1.58015084 | -4.25544548 | -3.70160961 | 6 | -1.6795673075 | -4.1938320338 | -3.4794751133 |
| 1 | 1.81114841  | -4.46745443 | -3.34454226 | 1 | 1.6909199930  | -4.5132776214 | -3.0997886714 |

|   |             |             |             |   |               |               |               |
|---|-------------|-------------|-------------|---|---------------|---------------|---------------|
| 6 | -2.95773482 | -2.31369472 | -4.20848131 | 6 | -2.9782458849 | -2.2489022583 | -4.0908384523 |
| 1 | -0.20200717 | -5.91871881 | -3.43717527 | 1 | -0.3586375521 | -5.8873592446 | -3.1423739897 |
| 6 | -2.68904424 | -5.08366346 | -4.00671864 | 6 | -2.8169551167 | -4.9940356040 | -3.7320196152 |
| 6 | -5.06504774 | -0.63469857 | 2.77483916  | 6 | -5.0283573244 | -0.7683189612 | 2.5920826020  |
| 6 | -3.75767279 | -1.16865206 | 2.99064660  | 6 | -3.7062022155 | -1.2763160354 | 2.8086894571  |
| 6 | -1.33901548 | -0.94239283 | 2.83627605  | 6 | -1.3098339849 | -0.9822744138 | 2.7079780463  |
| 1 | -6.20026827 | 1.01921284  | 2.03143883  | 1 | -6.1961096940 | 0.8504245115  | 1.8725604237  |
| 1 | -5.92097998 | -1.14047229 | 3.22522068  | 1 | -5.8710689176 | -1.3055234921 | 3.0181950243  |
| 6 | -3.56857562 | -2.25601339 | 3.87979102  | 6 | -3.5031111178 | -2.3926358037 | 3.6513460584  |
| 6 | -1.18056202 | -1.97675693 | 3.74225712  | 6 | -1.1340315275 | -2.0481128091 | 3.5543414840  |
| 6 | -2.30094028 | -2.66917968 | 4.24317408  | 6 | -2.2403626856 | -2.7888940688 | 4.0067489991  |
| 1 | -0.46015930 | -0.40724447 | 2.48738527  | 1 | -0.4444014727 | -0.4076256503 | 2.4056389292  |
| 1 | -4.45126629 | -2.73715639 | 4.30587673  | 1 | -4.3749822261 | -2.9106003778 | 4.0419878264  |
| 1 | -0.17833462 | -2.24969506 | 4.07454824  | 1 | -0.1341772719 | -2.3116228429 | 3.8845047582  |
| 1 | -2.16867137 | -3.49669123 | 4.94107389  | 1 | -2.0946961804 | -3.6397808750 | 4.6647094855  |
| 6 | -3.89516354 | -4.54246521 | -4.40927410 | 6 | -3.9956053992 | -4.4340837166 | -4.1506752309 |
| 6 | -4.01192284 | -3.14484000 | -4.54570007 | 6 | -4.0605651310 | -3.0460537863 | -4.3668360937 |
| 1 | -3.06492949 | -1.24174416 | -4.34965611 | 1 | -3.0418626085 | -1.1888891711 | -4.2985016579 |
| 1 | -2.55730391 | -6.16637135 | -3.95594907 | 1 | -2.7283429153 | -6.0714383224 | -3.6205019326 |
| 1 | -4.73615026 | -5.19098377 | -4.65727663 | 1 | -4.8591181757 | -5.0595562306 | -4.3538961593 |
| 1 | -4.93647957 | -2.71022940 | -4.92737436 | 1 | -4.9665605103 | -2.6009730387 | -4.7655927336 |
